# Supplementary material for: Deconvolution of single-cell multi-omics layers reveals regulatory heterogeneity
Source: PubMed Central journal article supplement (PMC6349937; doi:10.1038/s41467-018-08205-7), 2019-01-28
Supplement: 41467_2018_8205_MOESM3_ESM.pdf [file 41467_2018_8205_MOESM3_ESM.pdf]

## **Description of Additional Supplementary Files**

File Name: Supplementary Data 1

Description: Summary sequencing statistics for all scCAT-seq profiles.

File Name: Supplementary Data 2

Description: Published datasets downloaded from ENCODE.

File Name: Supplementary Data 3

Description: Chromatin accessibility read count matrix for cell line and PDX scCAT-seq profiles used in this study.

File Name: Supplementary Data 4

Description: Gene expression read count matrix for cell line and PDX scCAT-seq profiles used in this study.

File Name: Supplementary Data 5

Description: Chromatin accessibility read count matrix for embryo scCAT-seq profiles used in this study.

File Name: Supplementary Data 6

Description: Gene expression read count matrix for embryo scCAT-seq profiles used in this study.
